# Supplementary material for: Characterization of Three SEPALLATA-Like MADS-Box Genes Associated With Floral Development in Paphiopedilum henryanum (Orchidaceae)
Source: Front Plant Sci. 2022 May 26;13:916081. doi: 10.3389/fpls.2022.916081 (PMC9178235; doi:10.3389/fpls.2022.916081)
Supplement: Supplementary file 1 [file Table_1.XLSX]

## Sheet: Sheet1
SUPPLEMENTARY TABLE S1 | Primers used in this study
Primer	Sequence (5′-3′)	purpose
PhSEP1-F	ATGAGGAAAGAGGGCCCTCACCATC	Gene cloning
PhSEP1-R	TTATGCAAGCCAGCCCGGC	Gene cloning
PhSEP2-F	ATGGGGAGAGGGAGAGTGGAGC	Gene cloning
PhSEP2-R	TATTTTCTTTCGTTGGAAGGAAG	Gene cloning
PhSEP3-F	AGCAAATAGGGATGCACTCTCTCCT	Gene cloning
PhSEP3-R	GCATTATGTTTGGAGTAAAACGGGCTC	Gene cloning
qSEP1-F	GCTCAGCCTCATGCCGATGC	qRT-PCR
qSEP1-R	CCGGCGGCATGTAGTTAT	qRT-PCR
qSEP2-F	GGTGGAGGTGGAGGATCATCTAC	qRT-PCR
qSEP2-R	CCATTGGCAGTATGCGTGGAT	qRT-PCR
qSEP3-F	CTACTCAGCCACAGGGGGATG	qRT-PCR
qSEP3-R	CCACCCAGGTGGCATAAAATTAC	qRT-PCR
ACTIN-F	AGGCTGGATTTGCTGGTGA	qRT-PCR
ACTIN-R	CAGTTGCTTACAATTCCGTGC	qRT-PCR
DWSEP1-F	CCGAATTCGAGCTCCGTCGACATGGGAAGAGGGAGAGTGGAGC	Subcellular Localization
DWSEP1-R	TTGCTCACCATAAGCTTGTCGACTGCAAGCCAGCCCGGC	Subcellular Localization
DWSEP2-F	CCGAATTCGAGCTCCGTCGACATGGGGAGAGGGAGAGTGGAGC	Subcellular Localization
DWSEP2-R	TTGCTCACCATAAGCTTGTCGACCATCCATCCTGGAAAGAAGCCATTGG	Subcellular Localization
DWSEP3-F	CCGAATTCGAGCTCCGTCGACATGGGGAGAGGGAGAGTGGAGC	Subcellular Localization
DWSEP3-R	TTGCTCACCATAAGCTTGTCGACCATCCATCCTGGAAAGAAGCCATTGG	Subcellular Localization
BDSEP1-F	GGAGGCCGAATTCCCGGGCATGGGAAGAGGGAGAGTGGAGCT	Yeast assay
BDSEP1-R	GGCCGCTGCAGGTCGACGTCATGCAAGCCAGCCCGGC	Yeast assay
BDSEP2-F	GGAGGCCGAATTCCCGGGCATGGGGAGAGGGAGAGTGGAGCT	Yeast assay
BDSEP2-R	GGCCGCTGCAGGTCGACGTCACATCCATCCTGGAAAGAAGCCATTG	Yeast assay
BDSEP3-F	GGAGGCCGAATTCCCGGGCATGGGGAGAGGGAGGGTGGA	Yeast assay
BDSEP3-R	GGCCGCTGCAGGTCGACGTCATGCAAGCCACCCAGGTG	Yeast assay
