# Supplementary material for: Characterization of Three SEPALLATA-Like MADS-Box Genes Associated With Floral Development in Paphiopedilum henryanum (Orchidaceae)
Source: Front Plant Sci. 2022 May 26;13:916081. doi: 10.3389/fpls.2022.916081 (PMC9178235; doi:10.3389/fpls.2022.916081)
Supplement: Supplementary file 2 [file Table_2.XLSX]

## Sheet: SEP类信息
SUPPLEMENTARY TABLE S2| The data set for SEP-like genes and AP1-like genes used for aligment and phylogenetic analyses in this study
Species	Gene	GenBank ID	Nucleicacidsequences	Proteinsequences	Reference
Arabidopsis thaliana	AtSEP1	NM_121585.4	ATGGGAAGAGGAAGAGTAGAGCTGAAGAGGATAGAGAACAAAATCAACAGACAAGTAACGTTTGCAAAGCGTAGGAACGGTTTGTTGAAGAAAGCTTATGAATTGTCTGTTCTCTGTGATGCTGAAGTTGCTCTCATCATCTTCTCCAACCGTGGAAAGCTCTATGAGTTTTGCAGCTCCTCAAACATGCTCAAGACACTTGATCGGTACCAGAAATGCAGCTATGGATCCATTGAAGTCAACAACAAACCTGCCAAAGAACTTGAGAACAGCTACAGAGAATATCTGAAGCTTAAGGGTAGATATGAGAACCTTCAACGTCAACAGAGAAATCTTCTTGGGGAGGATTTAGGACCTTTGAATTCAAAGGAGTTAGAGCAGCTTGAGCGTCAACTGGAC…	MGRGRVELKRIENKINRQVTFAKRRNGLLKKAYELSVLCDAEVALIIFSNRGKLYEFCSSSNMLKTLDRYQKCSYGSIEVNNKPAKELENSYREYLKLKGRYENLQRQQRNLLGEDLGPLNSKELEQLERQLDGSLKQVRSIKTQYMLDQLSDLQNKEQMLLETNRALAMKLDDMIGVRSHHMGGGGGWEGGEQNVTYAHHQAQSQGLYQPLECNPTLQMGCCFGDDDDDDRYDNPVCSEQITATTQAQAQQGNGYIPGWML	Tabata S, Kaneko T, Nakamura Y, et al. Sequence and analysis of chromosome 5 of the plantArabidopsis thaliana[J]. Nature, 2000, 408(6814):823-826.
Arabidopsis thaliana	AtSEP2	NM_111098.4	ATGGGAAGAGGAAGAGTAGAGCTCAAGAGGATAGAGAACAAAATCAACAGACAAGTGACGTTTGCTAAACGTAGAAATGGTTTGCTGAAAAAAGCTTATGAGCTTTCTGTTCTCTGCGATGCTGAAGTCTCTCTCATCGTCTTCTCCAACCGTGGCAAGCTCTACGAGTTCTGCAGCACCTCCAACATGCTCAAGACACTGGAAAGGTATCAGAAGTGTAGCTATGGCTCCATTGAAGTCAACAACAAACCTGCTAAAGAGCTTGAGAACAGCTACAGAGAGTACTTGAAGCTGAAAGGTAGATATGAAAATCTGCAACGTCAGCAGAGAAATCTTCTTGGAGAGGATCTTGGACCTCTGAATTCAAAGGAGCTAGAGCAGCTTGAGCGTCAACTAGAC…	MGRGRVELKRIENKINRQVTFAKRRNGLLKKAYELSVLCDAEVSLIVFSNRGKLYEFCSTSNMLKTLERYQKCSYGSIEVNNKPAKELENSYREYLKLKGRYENLQRQQRNLLGEDLGPLNSKELEQLERQLDGSLKQVRCIKTQYMLDQLSDLQGKEHILLDANRALSMKLEDMIGVRHHHIGGGWEGGDQQNIAYGHPQAHSQGLYQSLECDPTLQIGYSHPVCSEQMAVTVQGQSQQGNGYIPGWML	Salanoubat M , Lemcke K , Rieger M , et al. Sequence and analysis of chromosome 3 of the plant Arabidopsis thaliana[J]. Nature, 2000.
Arabidopsis thaliana	AtSEP3	NM_180622.3	ATGGGAAGAGGGAGAGTAGAATTGAAGAGGATAGAGAACAAGATCAATAGGCAAGTGACGTTTGCAAAGAGAAGGAATGGTCTTTTGAAGAAAGCATACGAGCTTTCAGTTCTATGTGATGCAGAAGTTGCTCTCATCATCTTCTCAAATAGAGGAAAGCTGTACGAGTTTTGCAGTAGTTCGAGCATGCTTCGGACACTGGAGAGGTACCAAAAGTGTAACTATGGAGCACCAGAACCCAATGTGCCTTCAAGAGAGGCCTTAGCAGAACTTAGTAGCCAGCAGGAGTATCTCAAGCTTAAGGAGCGTTATGACGCCTTACAGAGAACCCAAAGGAATCTGTTGGGAGAAGATCTTGGACCTCTAAGTACAAAGGAGCTTGAGTCACTTGAGAGACAG…	MGRGRVELKRIENKINRQVTFAKRRNGLLKKAYELSVLCDAEVALIIFSNRGKLYEFCSSSSMLRTLERYQKCNYGAPEPNVPSREALAELSSQQEYLKLKERYDALQRTQRNLLGEDLGPLSTKELESLERQLDSSLKQIRALRTQFMLDQLNDLQSKERMLTETNKTLRLRLADGYQMPLQLNPNQEEVDHYGRHHHQQQQHSQAFFQPLECEPILQIGYQGQQDGMGAGPSVNNYMLGWLPYDTNSI	Theologis, Athanasios, Ecker, et al. Sequence and analysis of chromosome 1 of the plant Arabidopsis thaliana.[J]. Nature, 2000.
Arabidopsis thaliana	AtSEP4	NM_179599.2	ATGGGAAGAGGGAAAGTTGAGCTGAAGAGGATAGAGAACAAGATCAATAGACAAGTTACTTTTGCAAAGAGAAGAAATGGTTTGCTCAAGAAGGCTTATGAGCTTTCTGTCCTTTGTGATGCTGAGATTGCTCTTCTCATTTTCTCTAACCGTGGCAAGCTCTACGAATTCTGCAGCAGCCCTAGTGGTATGGCGAGGACGGTTGATAAGTATAGAAAACATAGTTATGCAACAATGGATCCAAATCAATCAGCTAAAGACTTGCAGGATAAGTATCAAGACTACTTGAAGCTTAAATCAAGAGTTGAGATCCTTCAACATTCACAAAGGCATTTGCTAGGTGAAGAGCTATCCGAGATGGATGTGAATGAGCTTGAGCATCTCGAACGCCAAGTAGAT…	MGRGKVELKRIENKINRQVTFAKRRNGLLKKAYELSVLCDAEIALLIFSNRGKLYEFCSSPSGMARTVDKYRKHSYATMDPNQSAKDLQDKYQDYLKLKSRVEILQHSQRHLLGEELSEMDVNELEHLERQVDASLRQIRSTKARSMLDQLSDLKTKEEMLLETNRDLRRKLEDSDAALTQSFWGSSAAEQQQQHQQQQQGMSSYQSNPPIQEAGFFKPLQGNVALQMSHYNHNPANATNSATTSQNVNGFFPGWMV	Xiaoying, Lin, Kaul, et al. Sequence and analysis of chromosome 2 of the plant Arabidopsis thaliana.[J]. Nature, 1999.
Arabidopsis thaliana	AtAP1	AY087956.1	ATGGGAAGGGGTAGGGTTCAATTGAAGAGGATAGAGAACAAGATCAATAGACAAGTGACATTCTCGAAAAGAAGAGCTGGTCTTTTGAAGAAAGCTCATGAGATCTCTGTTCTCTGTGATGCTGAAGTTGCTCTTGTTGTCTTCTCCCATAAGGGGAAACTCTTCGAATACTCCACTGATTCTTGTATGGAGAAGATACTTGAACGCTATGAGAGGTACTCTTACGCCGAAAGACAGCTTATTGCACCTGAGTCCGACGTCAATACAAACTGGTCGATGGAGTATAACAGGCTTAAGGCTAAGATTGAGCTTTTGGAGAGAAACCAGAGGCATTATCTTGGGGAAGACTTGCAAGCAATGAGCCCTAAAGAGCTTCAGAATCTGGAGCAGCAGCTTGAC…	MGRGRVQLKRIENKINRQVTFSKRRAGLLKKAHEISVLCDAEVALVVFSHKGKLFEYSTDSCMEKILERYERYSYAERQLIAPESDVNTNWSMEYNRLKAKIELLERNQRHYLGEDLQAMSPKELQNLEQQLDTALKHIRTRKNQLMYESINELQKKEKAIQEQNSMLSKQIKEREKILRAQQEQWDQHNQGHNMPPPLPPQQHQIQHPYMLSHQPSPFLNMGGLYQEDDPMAMRRNDLELTLEPVYNCNLGCFAA	Alexandrov N, Feldmann KA, Flavell RB, et al. Full-length messenger RNA sequences greatly improve genome annotation. Genome Biol[J]. 2002
Asparagus officinalis	AOM1	AY382400.1	ATGGGGAGAGGGAGAGTTGAGCTGAAGAGGATCGAGAACAAGATCAACAGGCAAGTGACCTTCGCGAAGAGAAGGAACGGACTCCTCAAGAAGGCCTACGAGCTCTCCGTGCTCTGCGATGCCGAGGTTGCCCTCATCATCTTCTCCAACCGTGGAAAGCTCTATGAGTTCTGCAGCAGCTCTAGCATGCTGAAAACACTTGAGAGATACCAAAAGTGCAGTTATGGAGCGCCAGATACCAGTGTACAAATAAGGGAGAGCCAGATGCTGCAGAGTAGTCATCAAGAGTACTTGAGACTCAAAGCGCGTGTTGAAGCTTTACAACGCTCACAAAGGAACCTTCTTGGTGAAGATCTTGGTCCATTGAGCAGCAAGGAGCTTGAGCAACTTGAAAGACAG…	MGRGRVELKRIENKINRQVTFAKRRNGLLKKAYELSVLCDAEVALIIFSNRGKLYEFCSSSSMLKTLERYQKCSYGAPDTSVQIRESQMLQSSHQEYLRLKARVEALQRSQRNLLGEDLGPLSSKELEQLERQLDSSLKQIRSTRTQYMLDQLADLQRREQMLCEANRSLRKRLEESSQANQQQVWEDANAMGYNRQPNQPHGDQFFHPLECQPTLQIGFQPDQMPGPSVSNYMPGWLA	Caporali E, Spada A, Losa A, et al. The MADS box gene AOM1 is expressed in reproductive meristems and flowers of the dioecious species Asparagus officinalis[J]. Sexual Plant Reproduction, 2000, 13(3):151-156.
Asparagus officinalis	AOM4	AY383560.1	ATGGGGAGGGGGAGAGTCGAGCTGAAGAGGATCGAGAACAAGATCAACAGGCAAGTGACCTTCGCCAAGAGGAGGAACGGGCTCCTCAAGAAAGCCTACGAGCTCTCCGTTCTCTGCGACGCCGAGGTCGCCCTCGTCGTCTTCTCCACTCGAGGCAAGCTCTACGAGTTCTGCAGCAGCCCCAGCATGCTGAAAACACTCGACAGATACCAAAAATGTAGTTATGGAGCACCAGATACCAGTGTACAAATACGGGAGAATCAGATGCTACAAAGTAGCCATCAAGAGTACTTGAAACTTAAAGCACGAGTTGAGGCTTTACAGAGATCTCAAAGGAATCTTCTTGGTGAAGATCTTGGGCCATTGAGCAGCAAGGAGCTCGAGCAACTTGAAAAACAA…	MGRGRVELKRIENKINRQVTFAKRRNGLLKKAYELSVLCDAEVALVVFSTRGKLYEFCSSPSMLKTLDRYQKCSYGAPDTSVQIRENQMLQSSHQEYLKLKARVEALQRSQRNLLGEDLGPLSSKELEQLEKQLDSSLKQIRSTRTQYMLDQLGDLQRKEQMLCEANRSLRKRYAQLEEASQANQQQVWEANANAMGYSRQPSQPQGEEFFHPLECQPSLGGQC	Losa A, Aporali E C, Spada A , et al. AOM3 and AOM4 : two MADS box genes expressed in reproductive structures of Asparagus officinalis[J]. Sexual Plant Reproduction, 2004, 16(5):215-221.
Cymbidium goeringii	CgSEP2	KX347447.1	ATGGGGAGGGGGAGAGTGGAGTTGATGAGGATTGAGAACAAGATAAACAGGCAAGTGACTTTTGCGAAGAGGAGGAATGGGTTGTTGAAGAAGGCTTATGAGCTATCGGTGCTCTGCGATGCGGAGGTTGCGCTGATCGTCTTCTCCAACCGCGGCAGACTATTTGAGTTCTGCAGCAGCAGTAGCATGGCAAAAACCCTTGAGAGGTACCAAAAGTGCAGCTATAATGCATCTGACTCCATGGTTCCATCCAAGGATACACAGCACAGTTATCAGGAGTACTTAAAGCTGAAAGCAAAAGTGGAATATCTACAACTGTCTCAAAGGAATCTTCTAGGAGAGGACCTAGTTGAATTAAGCAGCAAGGAACTGGAGGAACTTGAGCTCCAATTAGAAATG…	MGRGRVELMRIENKINRQVTFAKRRNGLLKKAYELSVLCDAEVALIVFSNRGRLFEFCSSSSMAKTLERYQKCSYNASDSMVPSKDTQHSYQEYLKLKAKVEYLQLSQRNLLGEDLVELSSKELEELELQLEMSLKHIRSTKTQLMLDQLCDLKRKEQILHEANRALKRKLQEDGPEIPLELTWPGGGANGSCERHQPQPDELFFQPLPCDPSLQIGYSPIYIDQQLNTGSTSAHNINGFFSGWM	Xian L, Chen Y, Chen L, et al. B and E MADS-box genes determine the perianth formation in Cymbidium goeringii Rchb.f[J]. Physiologia Plantarum, 2017.
Cymbidium goeringii	CgSEP3	MF462084.1	GAGATGGGAAGGGGAAGAGTAGAGCTGAAAAGGATTGAGAACAAGATTAACCGGCAAGTAACCTTTGCAAAGCGACGGAACGGCCTTCTCAAGAAGGCCTACGAGCTCTCCATCCTCTGCGAAGCGGAGGTTGCCCTCATCGTTTTCTCCAACCGTGGAAAGCTCTACGAGTTCTGCAGCAGCACAAGTATGTTAAAAACGTTAGACAGGTACCAAAAAAGCAATTATGGGGCCCCAGAACCAACTACAATATCTAGGGAGACCCAGACTAGTCATCAGGAGTACTTGAAACTTAAATCCCGATTAGAAACCTTACAAAGGTCGCAAAGGAATCTGCTTGGGGAAGACCTTGGTCCACTTAGTAGCAAAGAGCTCGAGCAGTTGGAGAGGCAACTGGAC…	MGRGRVELKRIENKINRQVTFAKRRNGLLKKAYELSILCEAEVALIVFSNRGKLYEFCSSTSMLKTLDRYQKSNYGAPEPTTISRETQTSHQEYLKLKSRLETLQRSQRNLLGEDLGPLSSKELEQLERQLDASLKQIRSTRTQFMLDQLADLQRREQMLCEANKALKRRFVETSQTNPNLVWDTSNTHAVGYGRQHSQHHEDAFYHPLESEPTLQIGYHSDITMAPGTATSVSNFMPSGWLGQISGSYE	Yang F, Zhu G, Wang Z, et al. Integrated mRNA and microRNA transcriptome variations in the multi-tepal mutant provide insights into the floral patterning of the orchid Cymbidium goeringii[J]. BMC Genomics, 2017, 18(1):1-24.
Cymbidium goeringii	CgSEP1	KF924272	ATGGGAAGAGGGAGAGTGGAACTGAAGCGGATCGAGAACAAGATCAACCGCCAAGTAACCTTTGCCAAGCGCAGGAACGGCCTCCTGAAGAAGGCCTATGAGCTCTCTGTCCTATGCGATGCTGAGGTCGCCCTTATCATCTTCTCCAACCGTGGGAAGCTTTATGAGTTTTGCAGCAACAATAGTATGATGAAGACCATAGAAAAATATCAGAAGTCTAATTATGGGGCACCAGAGACGAATGTCATATCAAGGGAAACCCAGAGTAGTCAGCAGGAGTACTTGAAACTAAAAAGTCGGGTTGAAGCCCTACAAAGATCCCAGAGAAATCTGCTGGGCGAAGACCTTGGTCCCCTTAGTAGCAAAGAACTCGAACAGCTGGAGCGGCAGCTGGACAGT…	MGRGRVELKRIENKINRQVTFAKRRNGLLKKAYELSVLCDAEVALIIFSNRGKLYEFCSNNSMMKTIEKYQKSNYGAPETNVISRETQSSQQEYLKLKSRVEALQRSQRNLLGEDLGPLSSKELEQLERQLDSSLKQIRSTRTQFMLDQLADLQRREQMLCEANKTLKRRLEESNQANPQQIWDPSTAHAMGYDRQPAQPHGDAFYHPLECEPTLQIGYQSDLTIAPMAAANVNNYMPPGWLA	Xiang L, Bo-Jun L I, Qin D H, et al. Cloning and Real-time Expression Analysis of GLO Gene from Cymbidium goeringii[J]. Acta Agriculturae Zhejiangensis, 2011.
Cymbidium goeringii	CgSEP4	APY18454.1	ATGGGAAGGGGAAGAGTGGAGCTGAAGATGATTGAGAACAAGATTAATCGACAAGTGACGTTTGCGAAGAGGAGGAATGGGTTACTGAAGAAGGCGTACGAGCTTTCAGTGCTCTGTGATGCTGAGGTTGCTCTCATCATCTTCTCCAACCGCGGCAGACTCTTTGAGTTCTGCAGTAGCTCAAGCATGATGAAGACACTTGAGAGATACCAAAAGTGCAGCTATAATTCATCAGAGACCACGATTCCATCCAAGGAGACGCAGAACAGTTATCAGGAATATTTAAAGCTGAAAGCAAGAGTTGAATATCTACAACGGTCACAGAGGAATCTTCTAGGAGAGGACCTAGGCCAGCTGACCACCAAGGAACTAGAACAACTAGAACACCAACTAGAAATG…	MGRGRVELKMIENKINRQVTFAKRRNGLLKKAYELSVLCDAEVALIIFSNRGRLFEFCSSSSMMKTLERYQKCSYNSSETTIPSKETQNSYQEYLKLKARVEYLQRSQRNLLGEDLGQLTTKELEQLEHQLEMSLKQIRSTKSQLMLDQLCDLKRKEQMLQEANRALRMKLQEDEPEIPLQLSWPGGGGSGRNGRGHCESHPQSEVFFQPLPCDPSLQIGYNPVCLEQQLNTGSSSHSVNGFIPGWM	Xian L, Chen Y, Chen L, et al. B and E MADS-box genes determine the perianth formation in Cymbidium goeringii Rchb.f[J]. Physiologia Plantarum, 2017.
Gerbera hybrida	GRCD2	AJ784156.1	ATGGGGAGAGGAAGAGTTGAGTTGAAGAGGATAGAAAACAAGATAAACAGGCAGGTGACTTTTGCTAAAAGAAGAAATGGCCTTCTCAAGAAAGCTTATGAACTCTCTGTTCTTTGCGATGCCGAGGTTGCTCTCATCATCTTCTCCAATCGCGGCAAGCTCTTTGAATTCTGCAGCACCTCCAACATGCTCAAGATGCTTGAAAGGTACCAGAATTGCACTTATGGTTCAATGGAAGTCGATAGATCAACCCCCAACGCCGAGCAAAGCAGCTACAAGGAGTACATGAAACTCAAAGCCAAATACGAGTCTCTACAACAATACCAAAGGCAACTCTTCGGGGAGGACCTGGGCCCGCTAAGTCTCAAAGAACTTGAACAACTAGAGCGACAACTAGAT…	MGRGRVELKRIENKINRQVTFAKRRNGLLKKAYELSVLCDAEVALIIFSNRGKLFEFCSTSNMLKMLERYQNCTYGSMEVDRSTPNAEQSSYKEYMKLKAKYESLQQYQRQLFGEDLGPLSLKELEQLERQLDSTLRQIRSIRTQSMLDRLSELQVKERMWVEANKALQNKLEEVYAENQAGPSWAAGEHHSSYGQEHQHQHQSQGFFQPLDCNSNLQIGYNTVDSSHITASTNGQNLNGLIPGWML	Uimari A, Kotilainen M, Elomaa P, et al. Integration of reproductive meristem fates by a SEPALLATA-like MADS-box gene[J]. Proceedings of the National Academy of Sciences, 2004, 101(44):15817-15822.
Gerbera hybrida	GRCD1	AJ400623.1	ATGGGAAAAGGAAGGTTAGAGTTGAAGAGAATAGAGAACAAAATAAACAGGCAAGTCACTTTTGCCAAGAGAAGAAATGGTCTCCTCAAGAAAGCTTACGAGCTTTCTGTTCTCTGCGATGCCGAAGTTGCTCTCATCGTCTTCTCCACTCGCGGCAAGCTCTATGAATTCTCCAGCACTTCCAGCATGTTGAAGACACTCGAGAGGTATGAGAAATGCAGCTTTGGGCCACCGGAGCAAAGAAGACCGGCGGCGAAGGAAGATCTACAGGAACAAAGTAGTTATCAAGAGTACATGAGGCTCAAAGAACGTTATGATGCCCTGAAACGACTCGAAAGGAATTACTACGGAGAGGAGATCGACTCGCTGACCACGAGCGAGCTTGAGTCACTCGAAAGA…	MGKGRLELKRIENKINRQVTFAKRRNGLLKKAYELSVLCDAEVALIVFSTRGKLYEFSSTSSMLKTLERYEKCSFGPPEQRRPAAKEDLQEQSSYQEYMRLKERYDALKRLERNYYGEEIDSLTTSELESLERQLHCSLKQIRTIRTQSLLDKLYEQQKMEHQLYESNKTLRLRLDEEGQAEALQWDAHAHANGMVYAHQHQVSQPMRDTFYHPTGCETTLQIGYQSEQMSAVNHQMQGWPA	Kotilainen M, Elomaa P, Uimari V, et al. GRCD1, an AGL2-like MADS box gene, participates in the C function during stamen development in Gerbera hybrida.[J]. Plant Cell, 2000.
Malus domestica	MdMADS9	AJ001682.1	ATGGGGAGAGGAAGAGTGGAGCTGAAGAGGATAGAGAACAAGATAAACAGGCAAGTCACATTTGCAAAGAGAAGAAATGGGCTTCTGAAGAAAGCTTATGAGCTCTCCGTTCTCTGTGATGCTGAGGTTGCTCTCATCGTCTTTTCCAACCGTGGCAAGCTCTATGAGTTTTGTAGCAGCCCTAGCATTCTCCAAACCGTAGACAGGTACAAAAAGTGCAGTTATGGTGCGGTGGATCAAGTCAACATACCTGCAAAGGAACTTGAGAGCAGCTATCGTGAGTACATGAAACTCAAAGGTAGATGTGAGTCCCTACAACGAACTCAGAGAAATCTTCTTGGTGAGGACTTGGGTCCATTAAACACAAAGGAGCTTGAGCAGCTTGAGCGCCAACTTGAG…	MGRGRVELKRIENKINRQVTFAKRRNGLLKKAYELSVLCDAEVALIVFSNRGKLYEFCSSPSILQTVDRYKKCSYGAVDQVNIPAKELESSYREYMKLKGRCESLQRTQRNLLGEDLGPLNTKELEQLERQLEASLKQVRSTKTQYMLDQLSALQNKEQLLIEANRDLTMKLDEIGSRNQLRQSWEGGDQGMAYGTQHHHAQSQGFFQPLDCNPTLQIGYPAEGSEQMGATTHAQQVNCFIPGWML	Jia㎜ong Y, Dong Y H , Kvarnheden A , et al. Seven MADS-box Genes in Apple are Expressed in Different Parts of the Fruit[J]. Journal of the American Society for Horticultural Science. American Society for Horticultural Science, 1999, 124(1):8-13.
Malus domestica	MdMADS1	U78947.1	ATGGGGAGAGGAAGAGTGGAGCTGAAGAGGATAGAGAACAAGATAAACAGGCAAGTCACATTTGCAAAGAGAAGAAATGGGCTTCTGAAGAAAGCTTATGAGCTCTCCGTTCTCTGTGATGCTGAGGTTGCTCTCATCATCTTCTCCAACCGTGGCAAGCTCTATGAGTTTTGCAGCAGCTCTAGCATTCTCAAAACACTAGACAGGTACCAAAAATGCAGTTATGGTGCAGTGGATCAAGTTAATAGACCTGCAAAGGAACTTGAGAGCAGCTATCGTGAGTACATGAAACTCAAAGGTAGATATGAGTCCCTACAACGAACTCAGAGAAACCTTCTTGGTGAGGACTTGGGTCCATTAAACACAAAGGAACTTGAGCAGCTTGAGCGTCAACTTGAG…	MGRGRVELKRIENKINRQVTFAKRRNGLLKKAYELSVLCDAEVALIIFSNRGKLYEFCSSSSILKTLDRYQKCSYGAVDQVNRPAKELESSYREYMKLKGRYESLQRTQRNLLGEDLGPLNTKELEQLERQLEGSLKQVRSTKTQYMLDQLSDLQNKEQLLIEANRDLTMKLDEISSRNQLRQSWEGGDQGMAYATQHHHAQSQGFFQPLDCNPTLQMGYSAVGSEQMSATTNAQQVNCFIPGWML	Soon-Kee S , An G . Molecular cloning and characterization of a MADS-box cDNA clone of the Fuji apple.[J]. Plant & Cell Physiology, 1997(4):484-489.
Oryza sativa	RMADS212	AY551922.1	ATGGGGCGAGGCAAGGTGGTGCTTCAGCGGATCGAGAACAAGATCAGCCGGCAGGTGACGTTCGCCAAGCGGCGGAACGGCCTGCTCAAGAAGGCCTACGAGCTCTCCATCCTCTGCGACGCCGAGGTCGCCCTCGTCCTCTTCTCCCACGCCGGCCGCCTCTACCAGTTCTCCTCCTCATCCAACATGCTTAAGACGCTTGAGAGATACCAGAGGTACATTTATGCTTCGCAAGATGCTGCCGCACCAACTAGCGATGAGATGCAGAACAACTATCAGGAATATGTGAACTTGAAGGCACATGTTGAGATTCTGCAACAATCACAAAGGAACCTTCTAGGTGAGGATTTAGCTCCACTGGCTACAAATGAACTTGAGCAGCTTGAGAGTCAAGTAGTC…	MGRGKVVLQRIENKISRQVTFAKRRNGLLKKAYELSILCDAEVALVLFSHAGRLYQFSSSSNMLKTLERYQRYIYASQDAAAPTSDEMQNNYQEYVNLKAHVEILQQSQRNLLGEDLAPLATNELEQLESQVVRTLKQIRSRKTQVLLDELCDLKRKEQMLQDANRVLKRKLDEIDVEAAPPQPPWNGNCSNGHGGGGGVFSSEPPQPEHFFQALGLHAVDVNQPPAPPPGGYPPEWMA	unpublished
Oryza sativa	OsMADS7	U78891.2	ATGGGGAGGGGTCGGGTGGAGCTGAAGAGGATCGAGAACAAGATCAACCGGCAGGTGACGTTCGCCAAGCGCAGGAATGGCCTGCTCAAGAAGGCGTACGAGCTCTCCGTCCTCTGCGACGCCGAGGTCGCCCTCATCATCTTCTCCAACCGCGGCAAGCTCTACGAGTTCTGCAGCACCCAGAGCATGACTAAAACGCTTGAGAAGTATCAGAAATGCAGTTACGCAGGACCCGAAACAGCTGTCCAAAATAGAGAAAGTGAGCAATTGAAAGCTAGCCGCAATGAATACCTCAAACTGAAGGCAAGGGTTGAAAATTTACAACGGACTCAAAGAAATTTGCTGGGTGAAGATCTTGATTCATTAGGCATAAAAGAGCTCGAGAGCCTAGAGAAGCAG…	MGRGRVELKRIENKINRQVTFAKRRNGLLKKAYELSVLCDAEVALIIFSNRGKLYEFCSTQSMTKTLEKYQKCSYAGPETAVQNRESEQLKASRNEYLKLKARVENLQRTQRNLLGEDLDSLGIKELESLEKQLDSSLKHVRTTRTKHLVDQLTELQRKEQMVSEANRCLRRKLEESNHVRGQQVWEQGCNLIGYERQPEVQQPLHGGNGFFHPLDAAGEPTLQIGYPAEHHEAMNSACMNTYMPPWLP	Kang H G, Jang S, Chung J E, et al. Characterization of Two Rice MADS Box Genes That Control Flowering Time[J]. Molecules and Cells, 1997, 7(4):559-566.
Oryza sativa	OsMADS8	U78892.1	ATGGGGAGAGGGAGGGTGGAGCTGAAGAGGATCGAGAACAAGATCAACAGGCAGGTGACGTTCGCGAAGCGGAGGAATGGGCTGCTCAAGAAGGCGTACGAGCTCTCCGTGCTCTGCGACGCCGAGGTCGCCCTCATCATCTTCTCCAACCGCGGCAAGCTCTACGAGTTCTGCAGCGGCCAAAGCATGACCAGAACTTTGGAAAGATACCAAAAATTCAGTTATGGTGGGCCAGATACTGCAATACAGAACAAGGAAAATGAGTTAGTGCAAAGCAGCCGCAATGAGTACCTCAAACTGAAGGCACGGGTGGAAAATTTACAGAGGACCCAAAGGAATCTTCTTGGTGAAGATCTTGGGACACTTGGCATAAAAGAGCTAGAGCAGCTTGAGAAACAA…	MGRGRVELKRIENKINRQVTFAKRRNGLLKKAYELSVLCDAEVALIIFSNRGKLYEFCSGQSMTRTLERYQKFSYGGPDTAIQNKENELVQSSRNEYLKLKARVENLQRTQRNLLGEDLGTLGIKELEQLEKQLDSSLRHIRSTRTQHMLDQLTDLQRREQMLCEANKCLRRKLEESNQLHGQVWEHGATLLGYERQSPHAVQQVPPHGGNGFFHSLEAAAEPTLQIGFTPEQMNNSCVTAFMPTWLP	Kang H G, Jang S, Chung J E, et al. Characterization of Two Rice MADS Box Genes That Control Flowering Time[J]. Molecules and Cells, 1997, 7(4):559-566.
Oryza sativa	OsMADS5	U78890.1	ATGGGGCGAGGGAAAGTAGAGCTGAAGCGGATCGAGAACAAGATAAGCCGGCAGGTGACGTTCGCGAAGAGGAGGAACGGGCTGCTGAAGAAGGCGTACGAGCTGTCCGTGCTCTGCGACGCCGAGGTCGCCCTCATCATCTTCTCCACCCGCGGCCGCCTCTTCGAGTTCTCCACCTCCTCCTGTATGTACAAGACACTGGAGCGATACCGCAGTTGCAACTACAACCTTAACTCATGTGAAGCATCTGCTGCACTGGAAACTGAACTAAGCAATTACCAAGAGTACTTAAAGTTAAAGACAAGAGTTGAGTTCCTACAAACAACTCAGAGAAATCTTCTTGGCGAGGACTTGGTTCCACTTAGCTTGAAGGAGCTCGAGCAACTTGAGAACCAGATC…	MGRGKVELKRIENKISRQVTFAKRRNGLLKKAYELSVLCDAEVALIIFSTRGRLFEFSTSSCMYKTLERYRSCNYNLNSCEASAALETELSNYQEYLKLKTRVEFLQTTQRNLLGEDLVPLSLKELEQLENQIEISLMNIRSSKNQQLLDQVFELKRKEQQLQDANKDLKRKIQETSGENMLHISCQDVGPSGHASEANQEFLHHAICDPSLHIGYQAYMDHLNQ	Kang H G, An G H. Isolation and characterization of a rice MADS box gene belonging to the AGL2 gene family.[J]. Molecules & Cells, 1997, 7(1):45-51.
Paphiopedilum henryanum	PhSEP1	MN274961	ATGGGAAGAGGGAGAGTGGAGCTGAAGCGGATCGAGAATAAGATCAACCGGCAAGTGACCTTCGCCAAGCGACGCAACGGACTGCTTAAGAAGGCCTATGAGCTCTCTGTCCTCTGTGATGCAGAAGTAGCGCTCATCATCTTCTCCAACCGCGGCAAGCTTTACGAGTTCTGCAGCAGCTCCAGCATGCTGAATACATTAGAGAGGTACCAGAAATGCAATTATGGGGCACCCGAAACAAGTATAATATCAAGAGAGACCCAGAGTAGTCAGCAGGAGTACTTGAAGCTTAAGTCCCGCGTTGAAGCATTGCAAAGATCCCAGAGGAATCTGTTAGGCGAGGACCTTGGTCCCCTTAATAGCAAGGAACTCGAGCAGCTGGAGAGGCAGCTGGACGCT…	MGRGRVELKRIENKINRQVTFAKRRNGLLKKAYELSVLCDAEVALIIFSNRGKLYEFCSSSSMLNTLERYQKCNYGAPETSIISRETQSSQQEYLKLKSRVEALQRSQRNLLGEDLGPLNSKELEQLERQLDASLRQIRSTRTQFMLDQLADLQRREQMLCEANKVLKRRFEESSQANPQQVWDPTAAHAVGYGRQPAQPHADAFYHPLDCEPTLQIGYHSDLTIAPMAAPNVNNYMPPGWLA	This study
Paphiopedilum henryanum	PhSEP2	MN274962	ATGGGGAGAGGGAGAGTGGAGCTGAAGAGGATAGAGAACAAGATAAACCGGCAGGTGACGTTTGCGAAGAGGAGGAATGGGCTACTGAAGAAGGCATACGAGCTCTCGGTGCTGTGCGACGCGGAGGTCGCTCTCATCGTCTTCTCCAACCGCGGCCGCCTCTTCGAGTTCTGCAGCAGCTCCAGCATGATGAAAACACTTGAGAGATATCAAAAGTGCAGTTACAGTGCATCAGAATCCGTCACTCCGTCAAAGGAGACACAGAACAGCTATCAGGAATATCTAAACCTGAAACTAAGAGTTGAACATCTACAACGTTCTCAGAGGAATCTTCTAGGAGAGGACCTGGAACAGCTAACCACCAAGGAACTACAGGAACTTGAACACCAACTGGAAATG…	MGRGRVELKRIENKINRQVTFAKRRNGLLKKAYELSVLCDAEVALIVFSNRGRLFEFCSSSSMMKTLERYQKCSYSASESVTPSKETQNSYQEYLNLKLRVEHLQRSQRNLLGEDLEQLTTKELQELEHQLEMSLRQIRSTKTQLMLDQLCDLKRKEQMLQEANRAFRKKLQEDGPEIPLQLSWPGGGGGSSTRQPQSEEFFQPLPCDPSLQIGFSPLCIDQQLNTGSSTHTANGFFPGWM	This study
Paphiopedilum henryanum	PhSEP3	MN809620	ATGGGGAGAGGGAGGGTGGAGCTGAAGCGGATCGAGAACAAGATAAACCGTCAAGTGACTTTCGCCAAGCGTCGCAATGGCCTCCTTAAAAAGGCCTACGAGCTCTCCGTACTCTGCGACGCCGAGGTTGCCCTCATCATCTTCTCTAACCGTGGCAAGCTCTACGAGTTCTGCAGCAACTCCAGTATGCTGAAGAGTCTTGAGAGGTACCAAAAATGCAACTATGGGGCACCAGAGACAAGTATCATATCAAGAGAGACCCAGAGCAGTCAGCAGGAGTACTTGAAACTTAAATCACGGGTTGAAGCCTTACAAAGATCCCAAAGAAATCTGCTGGGAGAGGACCTTGGTCCCCTTAACAGCAAAGAGCTTGAGCAGTTGGAACATCAGCTTGACGCA…	MGRGRVELKRIENKINRQVTFAKRRNGLLKKAYELSVLCDAEVALIIFSNRGKLYEFCSNSSMLKSLERYQKCNYGAPETSIISRETQSSQQEYLKLKSRVEALQRSQRNLLGEDLGPLNSKELEQLEHQLDASLRQIRSTRTQFMLDQLGDLQRREQMLCEANKSLKRRFEESSQVNPEQVWDPSVAHGVGYGRQPTQPQGDGFYHPLDCEPNLQIGYHSDITLASASTPNVGNFMPPGWLA	This study
Petunia x hybrida	PMADS12	AY370527.1	ATGGGTAGAGGAAGAGTAGAGTTGAAGAGGATAGAAAATAAGATAAATAGGCAAGTGACTTTTGCAAAGAGAAGAAATGGGTTGCTTAAAAAAGCTTATGAATTATCTGTGCTTTGTGATGCTGAAGTTGCTCTCATCATTTTCTCTAATCGTGGCAAGCTCTATGAATTCTGCAGCTCCAACAATATGTTCAAAAGCCTTGAAAGGTACCAAAAGTGCAGCTATGGTACATTGGAAGTCAACCAATCAAGCAAAGATAATGAGCAAAACAACTATAGGGAATACCTAAAACTCAAAGCCAAATATGAGTCACTGCAGCGATATCAAAGACACCTTCTTGGAGAAGACTTGGGGCCTCTTAATATAGATGATCTTGAGAATCTTGAAGTCCAACTAGAT…	MGRGRVELKRIENKINRQVTFAKRRNGLLKKAYELSVLCDAEVALIIFSNRGKLYEFCSSNNMFKSLERYQKCSYGTLEVNQSSKDNEQNNYREYLKLKAKYESLQRYQRHLLGEDLGPLNIDDLENLEVQLDTSLKHIRSTRTQLMLDQLSDLQTKEKLWVEANKVLERKLEEIYAENSLQQSWGGGEQSVTYGHQHNAQSQGFFQPLECNSTLQIGYNPITTSRQITAVTNAQNVNGMVPGWML	Vandenbussche M, Zethof J, Souer E, et al. Toward the Analysis of the Petunia MADS Box Gene Family by Reverse and Forward Transposon Insertion Mutagenesis Approaches: B, C, and D Floral Organ Identity Functions Require SEPALLATA-Like MADS Box Genes in Petunia[J]. THE PLANT CELL ONLINE, 2003, 15(11):2680-2693.
Petunia x hybrida	PFBP23	AF335241.1	ATGGGAAGGGGAAGAGTTGAGCTGAAGAGAATAGAAAACAAAATAAACAGGCAAGTTACTTTTGCTAAGAGAAGAAATGGACTTCTCAAGAAAGCCTATGAACTTTCTGTTCTCTGTGATGCTGAAGTTGCACTTATTATCTTCTCTAATCGGGGTAAACTCTATGAGTTCTGCAGCACTTCAAGCATGACGAAAACAATTGAAAAATATCAACGTTGCAGCTATGCGACTTTGGAAGCCAACCAATCAGCTACTGATAATCAGAACAACTACCACGAGTATCTGAGGCTAAAAGCTAGAGTTGAGCTCCTTCAACGATCTCAGAGAAACCTTCTTGGGGAAGATTTGGGGACACTAAGCACGAAGGACCTTGAGCAGCTTGAGAATCAATTAGAGAGT…	MGRGRVELKRIENKINRQVTFAKRRNGLLKKAYELSVLCDAEVALIIFSNRGKLYEFCSTSSMTKTIEKYQRCSYATLEANQSATDNQNNYHEYLRLKARVELLQRSQRNLLGEDLGTLSTKDLEQLENQLESSLKQIRSRKTQFMLDQLADLQQREQMLAESNKQLRQKLEESVAGIPHRLCWEDGLQAMQHNSRLPQTEGFFQPLGLNSSNSPQFGYNPAGTDVENAAATTHNMNGFIHGWML	Patrice, Morel, Pierre, et al. Divergent Functional Diversification Patterns in the SEP/AGL6/AP1 MADS-Box Transcription Factor Superclade.[J]. The Plant cell, 2019, 31(12):3033-3056.
Petunia x hybrida	PFBP9	AF335236.1	ATGGGAAGGGGAAGAGTAGAGCTAAAGAGGATAGAGAACAAAATAAACAGGCAAGTTACTTTTGCTAAGAGAAGAAATGGACTTCTCAAGAAAGCTTATGAGCTCTCTGTGTTATGTGATGCTGAAGTTGCTCTTATCATTTTCTCTAGCCGTGGCAAACTCTATGAATTCTGCAGCACTTCCAGCATGATGAAAACACTTGAAAAGTATCAACAGTGCAGCTACGCTTCTTTGGACCCCATGCAATCAGCTAATGATACTCAGAACAACTACCATGAGTATCTGAGGCTAAAAGCAAGAGTTGAGCTCCTTCAACGATCTCAGAGAAATCTCCTTGGGGAGGATTTGGGCTCACTAAATTCGAAGGAACTTGAGCAGCTTGAGCACCAATTGGATTCA…	MGRGRVELKRIENKINRQVTFAKRRNGLLKKAYELSVLCDAEVALIIFSSRGKLYEFCSTSSMMKTLEKYQQCSYASLDPMQSANDTQNNYHEYLRLKARVELLQRSQRNLLGEDLGSLNSKELEQLEHQLDSSLKQIRSKKTQHMLDQLADLQQKEQMLAEANKQLRRKLEESAARIPLRLSWDNGGQPMQHNRLPPQTEGFFQPLGLNSSSPQFGYSPMGANEVNNAVSTAQNMNGFIPGWML	Richards G H Immink, Theodorus W J Gadella, Silvia F, et al. Analysis of MADS box protein–protein interactions in living plant cells[J]. PANS.2002
Petunia x hybrida	PFBP5	AF335235.1	ATGGGAAGAGGAAGAGTAGAGTTGAAGAAGATAGAAAACAAGATTAATAGACAAGTTACTTTTGCAAAGAGAAGAAATGGACTTCTTAAGAAAGCTTATGAATTGTCTGTACTTTGTGAAGCTGAAGTTGCTCTTATCATTTTCTCTAATCGTGGCAAACTTTATGAGTTCTCCAGCACTTCCAACATGGTCAAGACCCTTGATAGGTACCAAAAATGTAGCTATGGCACATTGGAAGTCAACCATAGATCTGTCAAAGATAATAATGAGGAAAGAATCTATAGGGAGTACTTGAAGCTTAAGGCCAAATATGAGTCGTTACAACGATATCAAAGACAACTTCTTGGAGATGAACTAGGGCCTTTAAACATAGATGAGCTTGAGCATCTTGAGCTTCAA…	MGRGRVELKKIENKINRQVTFAKRRNGLLKKAYELSVLCEAEVALIIFSNRGKLYEFSSTSNMVKTLDRYQKCSYGTLEVNHRSVKDNNEERIYREYLKLKAKYESLQRYQRQLLGDELGPLNIDELEHLELQLDSSLKLIKSTRTQLMLDQLSDLQTKEKLWVEANKVLERKLEQIYAENNIQQSWGGGEQSGAYGQQHAQTQGFFQPLECNSTLQIGYDPATSSQITAVTSGQNVNGIIPGWML	Ferrario S, Lange J, Busscher M, et al. Petunia x hybrida MADS-box transcription factor FBP5 (FBP5) mRNA, complete cds. 2001.
Petunia x hybrida	PFBP2	M91666.1	ATGGGAAGAGGTAGAGTTGAGCTTAAGAGAATAGAGAACAAAATCAATAGACAAGTTACCTTTGCTAAGAGAAGAAATGGACTATTGAAAAAAGCTTATGAACTTTCTGTTCTTTGTGATGCTGAAGTTGCTCTTATTATTTTCTCTAATAGGGGAAAATTGTACGAGTTTTGCAGTAGCTCTAGCATGCTCAAGACCTTAGAGAGGTACCAGAAGTGTAACTATGGAGCACCAGAGACTAATATATCCACACGAGAAGCACTGGAAATAAGCAGCCAACAAGAGTACTTGAAGCTTAAAGCACGTTACGAAGCATTACAGCGATCACAGAGGAATCTTCTTGGTGAAGATCTTGGCCCTTTGAACAGCAAAGAACTTGAATCACTTGAAAGGCAGCTT…	MGRGRVELKRIENKINRQVTFAKRRNGLLKKAYELSVLCDAEVALIIFSNRGKLYEFCSSSSMLKTLERYQKCNYGAPETNISTREALEISSQQEYLKLKARYEALQRSQRNLLGEDLGPLNSKELESLERQLDMSLKQIRSTRTQLMLDQLQDLQRKEHALNEANRTLKQRLMEGSTLNLQWQQNAQDVGYGRQATQTQGDGFFHPLECEPTLQIGYQNDPITVGGAGPSVNNYMAGWLP	Angenent G C, Busscher M, Franken J, et al. Differential expression of two MADS box genes in wild-type and mutant petunia flowers.[J]. Plant Cell, 1992, 4(8):983-993.
Petunia x hybrida	PFBP4	AF335234.1	ATGGGAAGAGGGAAGGTAGAACTGAAGAGAATTGAGAACAAAATAAATAGACAAGTGACTTTTGCAAAGAGAAGAAATGGACTTCTCAAGAAGGCTTATGAACTTTCTGTTCTTTGTGATGCTGAGGTTGCTCTTATTATCTTTTCAAACCGTGGCAAACTCTATGAATTTTGCAGCAGCTCAAGTATGTCCACTACATTGGAGAAATACCATAGATACTGTTATGGTGCACTTGAAGGAAGCCAACCTTCAACAGATTCACAGAACATCTACCAGGAGTATCTGAAGCTTAAAACAAGAGTGGAAGCTTTACAACAGTCTCAAAGGCATATGCTAGGAGCGGATTTAGGACAATTAGGCACAAAAGACCTTGAACAGCTCGAACGTCAACTGGACTCA…	MGRGKVELKRIENKINRQVTFAKRRNGLLKKAYELSVLCDAEVALIIFSNRGKLYEFCSSSSMSTTLEKYHRYCYGALEGSQPSTDSQNIYQEYLKLKTRVEALQQSQRHMLGADLGQLGTKDLEQLERQLDSSLRQIRSTRTQNMLDQLSELQEKQEQSLIEMNKSLRMKLEELGVAFQTSMHSGEESVQYRQQPAEPEGLFHPVECNNSLPIRYNTLPREHVVPSAQDSTGVLPGWML	Immink R G H , Hannapel D J , Ferrario S , et al. A petunia MADS box gene involved in the transition from vegetative to reproductive development[J]. Development, 1999, 126(22):5117-5126.
Petunia x hybrida	PFBP29	AF335245.1	ATGGGGAGGGGTAGGATTCAGTTGAAGCGAATCGAAAACAAGATCAGTAGGCAAGTTACCTTCTCAAAGAGACGCTCTGGATTGTTAAAGAAAGCACATGAGATCTCCGTTTTATGTGATGCTGATGTTGCTTTAATAGTTTTTTCTACCAAAGGCAAGTTATTTGAGTACTCCACTGAGTCCAGCATGGAAAGTATACTGGAAAGGTACGAAAGATACTCATATGCAGAGAGAAAGCTGAATGCTAATGACTCTGATCCCAAGGAAAATTGGACACTGGAGTACCCGAAGCTCATGTCAAGAATTGAACTTATACAAAGAAATATAAGGCATTATATGGGTCAGGATCTGGACCCTCTCAGTTTGCGAGAGCTGCAGAGTTTAGAGCAACAAATTGAC…	MGRGRIQLKRIENKISRQVTFSKRRSGLLKKAHEISVLCDADVALIVFSTKGKLFEYSTESSMESILERYERYSYAERKLNANDSDPKENWTLEYPKLMSRIELIQRNIRHYMGQDLDPLSLRELQSLEQQIDTALKRIRSRKNQLMHESISELHKKERALQEQNNLMTKKLKENEKTQSGQTQPISSQNDATFMVPQPPSLSHHVANLTIGGAFGAKTVTNTNGVQASNSQMPPWMIRHVNNEG	Immink R G H , Hannapel D J , Ferrario S , et al. A petunia MADS box gene involved in the transition from vegetative to reproductive development[J]. Development, 1999, 126(22):5117-5126.
Petunia x hybrida	PFBP26	AF176783.1	ATGGGGAGAGGAAGAGTGCAACTCAAGAGAATTGAAAACAAAATCAATCGACAAGTTACGTTTTCGAAACGACGATCTGGGTTGTTGAGGAAAGCTCATGAGATTTCTGTGCTTTGTGATGCTGAAGTTGGACTAATTGTTTTCTCCACTAAAGGCAAACTCTTTGAGTATTCTACTGATTCTTGCATGGAAAGGATTCTTGAAAGGTATGAAAGATACTCATATGCTGAGAGGCAGCTTAGTGGCGCCACTGATAATGATACTCCGGGGAGCTGGACTCTGGAACATGCTAAGCTTAAGGCCAGGCTTGAAGTTTTGCAAAGAAACCAAAAGCATTATGCGGGAGAAGACTTGGATTCCTTAAGCATGAAAGAGCTTCAAAATTTGGAGCAGCAGCTC…	MGRGRVQLKRIENKINRQVTFSKRRSGLLRKAHEISVLCDAEVGLIVFSTKGKLFEYSTDSCMERILERYERYSYAERQLSGATDNDTPGSWTLEHAKLKARLEVLQRNQKHYAGEDLDSLSMKELQNLEQQLDSALKQIRSRKNQLMHESISELQKKDKALQEQNNKLSKQVKEREKELAQQSQWEPQSHDLNSSSFVLSQPLNSLHLGEAYPSAGDNGEVEGSSRQQPPNTVMPPWMLRHLNG	Immink R G H, Hannapel D J, Ferrario S, et al. A petunia MADS box gene involved in the transition from vegetative to reproductive development[J]. Development, 1999, 126(22):5117-5126.
Phalaenopsis equestris	PeSEP2	KF673858.1	ATGGGGAGAGGAAGGGTGGAGATGAAGAGGATTGAGAACAAGATAAACAGGCAGGTGACGTTTGCGAAGAGGAGGAATGGATTGTTGAAGAAGGCTTATGAGCTATCGGTGCTGTGCGATGCGGAGGTTGCGTTGATCGTTTTCTCCAACCGCGGCCGACTGTTTGAGTTCTGCAGCAGTAGTAGCATGACGAAAACCCTTGAGAGGTACCAAAAATGCAGCTATAATGCAACTGAGTCCACGGTTCCATCAAAGGATACACAGAATAGTTATCAAGAGTATTTGAAGTTGAAAACAAAGGTGGAATATCTACAACGGTCCCAAAGGAATCTTCTGGGAGAGGACTTGATTGAGCTAGGCAGCAAGGAGCTAGAGCAACTTGAGCTTCAACTAGAAATG…	MGRGRVEMKRIENKINRQVTFAKRRNGLLKKAYELSVLCDAEVALIVFSNRGRLFEFCSSSSMTKTLERYQKCSYNATESTVPSKDTQNSYQEYLKLKTKVEYLQRSQRNLLGEDLIELGSKELEQLELQLEMSLKQIRSTKTQLMLDQLCDLKRKEQMLQEANRALRRKLQEDEPEIPLELSWTGGGGNGPCERQQPQSEDFFQPLPSLQIGFSPICIDQQLNTGSSSAHNINGFISGWM	Pan Z J, Chen Y Y, Du J S, Chen Y Y, et al. Flower development of Phalaenopsis orchid involves functionallydivergent SEPALLATA-like genes[J]. New Phytologist, 2014.202(3):1024-1042
Phalaenopsis equestris	PeSEP4	KF673860.1	ATGGGAAGGGGAAGAGTGGAGCTGAAGATGATTGAGAACAAGATTAATAGACAAGTGACGTTTGCAAAGAGGAGGAATGGATTACTGAAGAAGGCGTATGAGCTTTCAGTGCTCTGTGATGCTGAGGTTGGCCTAATCGTCTTTTCCAACCGAGGCAGACTATTTGAGTTCTGCAGTAGCTCCAGCATGATGAAGACAATCGAGAGATACCAAAAGTGCAGCTATAATACAACAGAGACCAGAATTCCATCCAAGGAGACGCAGAACAATTATCAGGAATATTTAAAGTTGAAAGCAAAAGTTGAATATCTACAACGGTCACAAAGAAATCTTCTAGGAGAGGACCTAGCTCTACTGACCACAAAGGAACTAGAGCAACTAGAACACGAATTAGAAATG…	MGRGRVELKMIENKINRQVTFAKRRNGLLKKAYELSVLCDAEVGLIVFSNRGRLFEFCSSSSMMKTIERYQKCSYNTTETRIPSKETQNNYQEYLKLKAKVEYLQRSQRNLLGEDLALLTTKELEQLEHELEMSLKKIRSTKSQLMLDQLCDLKRKEQMLQEANKALRMKLQEDEPEMPLQLSWSGGRTAGNARSPCGRQPQSDVFFQPLPCDPTLQIGYNPICIEEQLNNGSSSHNINGFLPGWM	Pan Z J, Chen Y Y, Du J S, Chen Y Y, et al. Flower development of Phalaenopsis orchid involves functionallydivergent SEPALLATA-like genes[J]. New Phytologist, 2014.202(3):1024-1042
Phalaenopsis equestris	PeSEP3	KF673859.1	ATGGGAAGAGGGAGAGTGGAGCTGAAGAGGATTGAGAACAAGATTAACCGTCAAGTAACCTTCGCCAAGCGCAGGAACGGCCTTCTCAAGAAGGCCTATGAGCTCTCCGTCCTCTGCGATGCGGAGGTTGGCCTCATCATTTTCTCCAATCGTGGAAAGCTCTACGAGTTCTGCAGCAACACGAGTATGTTAAAAACGTTAGAGAAGTACCAAAAATGCAATTTCGGAGGCCCAGAAACAACTATCATATCAAGGGAGACCCAGAATAGTCAACAGGAGTACTTGAAACTTAAATCCAGAGTAGAAGCCTTGCAAAGATCGCAGAGAAATTTGCTTGGGGAGGACCTCGCTCCACTTAGCGGCAAGGAGCTCGAGCAATTAGAGAGGCAAGTGGACTCC…	MGRGRVELKRIENKINRQVTFAKRRNGLLKKAYELSVLCDAEVGLIIFSNRGKLYEFCSNTSMLKTLEKYQKCNFGGPETTIISRETQNSQQEYLKLKSRVEALQRSQRNLLGEDLAPLSGKELEQLERQVDSSLKQIRSTRTQFMLDQLADLQRREQMLCEANRALKIRFEEGSQANQPQVWDPSNTHAVGYGRQPAQHHGEAFYHPLDSEPTLQIGYHSDITMATATTSTVNNYMLPGWLGQISGSYE	Pan Z J, Chen Y Y, Du J S, Chen Y Y, et al. Flower development of Phalaenopsis orchid involves functionallydivergent SEPALLATA-like genes[J]. New Phytologist, 2014.202(3):1024-1042
Phalaenopsis equestris	PeSEP1	KF673857.1	ATGGGAAGAGGGAGAGTGGAGCTGAAGCGGATCGAGAACAAGATCAACCGCCAAGTAACCTTCGCCAAGCGCAGGAACGGCCTCCTAAAGAAGGCCTATGAGCTCTCTGTCCTCTGCGAAGCAGAAGTCGCCCTCATCATCTTCTCCAACCGCGGAAAGCTTTATGAGTTTTGCAGCAGCTCTAGTATGTTGAAGACCCTAGAGAGATACCAAAAGAACAATTATGGTGCACCAGAAACAAATATTATATCGAGAGAAACCCAGAGTAGTCAGCAGGAGTACTTGAAACTAAAATCTCGGGTAGAAGCCTTACAAAGATCCCAGAGGAATCTGCTGGGCGAGGACCTTGGTCCGCTTAATAGCAAAGAACTGGAACAGCTAGAGCGGCAGCTGGACAAT…	MGRGRVELKRIENKINRQVTFAKRRNGLLKKAYELSVLCEAEVALIIFSNRGKLYEFCSSSSMLKTLERYQKNNYGAPETNIISRETQSSQQEYLKLKSRVEALQRSQRNLLGEDLGPLNSKELEQLERQLDNSLKQIRSTRTQFMLDQLADLQRREQMLCEANKTLKRRLEESNQANPQQIWDPSTAHAMGYDQRQPVQPHGEAFYHPLECEPTLHIGYHSDLSIAPMAAPNVNNYMPPGWLA	Pan Z J, Chen Y Y, Du J S, Chen Y Y, et al. Flower development of Phalaenopsis orchid involves functionallydivergent SEPALLATA-like genes[J]. New Phytologist, 2014.202(3):1024-1042
Zea mays	M24	AJ430638.1	ATGGGGCGCGGGAAGGTGGTGCTGCAGCGGATCGAGAACAAGATCAGCCGGCAGGTGACCTTCGCCAAGCGCCGGAACGGCCTGCTCAAGAAGGCGTACGAGCTCTCCGTCCTCTGCGACGCCGAGGTCGCGCTCGTCCTCTTCTCCCACGCCGGCCGCCTCTACCAGTTCTCATCCTCCTCCAATCTGCTTAAGACTCTAGAGCGGTACCAGAGGTACATCTATGCTTCAGCCGATGCTGCAGTGCCATCTAGCGATCAGATGCAGAATAACTATCAAGAATATGTGAAGCTGAAGGCACGAGTTGAGGTTTTACAGCACTCACAAAGGAATCTTCTTGGTGAAGATCTGGCCCTACTTAGCCCAAGTGAACTTGACCAGCTTGAGAATCAAGTAGAC…	MGRGKVVLQRIENKISRQVTFAKRRNGLLKKAYELSVLCDAEVALVLFSHAGRLYQFSSSSNLLKTLERYQRYIYASADAAVPSSDQMQNNYQEYVKLKARVEVLQHSQRNLLGEDLALLSPSELDQLENQVDKTLKQIRSRKTQVLLDELCDLKRKEQMLQDANRVLKRKLGEFEAEAASPPQLAWQGEGGMLSHDPPQPEHFFQALESNPCLQPTYHTMDMNQQPVPAPGGCYPAWMS	Münster, T,Deleu W, Wingen L U, et al. Maize MADS-box genes galore[J]. Maydica, 2002, 47(3):287-301.
Zea mays	M31	AJ430640.1	ATGGGGCGCGGCAAGGTGGTGCTGCAGCGGATCGAGAACAAGATCAGCCGCCAGGTCACCTTCGCCAAGCGCCGGAACGGCCTGCTCAAGAAGGCGTACGAGCTCTCCATCCTCTGCGACGCCGAGGTCGCGCTCGTCCTCTTCTCCCACGCCGGCCGCCTCTACCAGTTCTCATCCTCCTCCGATCTGCTTAAGACTCTAGAGCGGTACCAGAGGCACATCTATGCTTCAGCTGATGCTGCAGTGCCATCTAGCGATGAGATGCAGAATAACTATCAAGAATATGTGAAGCTGAAAGCACGAGTTGAGGTTTTACAACACTCGCAAAGGAATCTTCTTGGTGAAGAACTGGCTCCACTTAGCCCAAGTGAACTTGACCAGCTTGAGAGTCAAGTAGAC…	MGRGKVVLQRIENKISRQVTFAKRRNGLLKKAYELSILCDAEVALVLFSHAGRLYQFSSSSDLLKTLERYQRHIYASADAAVPSSDEMQNNYQEYVKLKARVEVLQHSQRNLLGEELAPLSPSELDQLESQVDKTLKQIRSRKTQVLLDELCDLKRKEQMLQDANRVLKRKLHEFEAEAASPPQLAWQGGGGMLSHDPPQPEHFFVALESNAPLQPTYHTMDMNQQPEPAPGGCYPPAWMA	Münster, T, Deleu W , Wingen L U , et al. Maize MADS-box genes galore[J]. Maydica, 2002, 47(3):287-301.
Zea mays	M27	AJ430694.1	ATGGGGAGGGGTCGGGTGGAGCTCAAGCGGATCGAGAACAAGATCAACCGCCAGGTCACCTTCGCCAAGCGCCGCAACGGCCTGCTCAAGAAGGCGTACGAGCTCTCCGTGCTCTGCGACGCCGAAGTCGCGCTCATCATCTTCTCCAACCGCGGCAAGCTCTACGAGTTCTGCAGCGGACAGAGCATCACCAAAACACTTGAGAGGTATGAAAAAAACAGTTATGGAGGACCAGATACTGCTGTACAGAACAAGGAGAACGAGTTAGTCCAGAGCAGTCGTAATGAGTACCTCAAGCTGAAAGCGAGGGTGGATAATTTACAGAGGACTCAGAGGAATTTGCTTGGTGAAGATCTGGGGTCACTTGGTGTCAAAGAGCTTGAGCAGCTTGAGAAGCAA…	MGRGRVELKRIENKINRQVTFAKRRNGLLKKAYELSVLCDAEVALIIFSNRGKLYEFCSGQSITKTLERYEKNSYGGPDTAVQNKENELVQSSRNEYLKLKARVDNLQRTQRNLLGEDLGSLGVKELEQLEKQLDSSLRHIRSTRTQHMLDQLTDLQRREQMLCEANKCLRRKLEETSNQVHGQVWEHGANLLGYERHSPQQQAPSHVGNGLFFHPLEAAAEPTLQIGFAPEHMNNFMPTWLP	Münster, T, Deleu W , Wingen L U , et al. Maize MADS-box genes galore[J]. Maydica, 2002, 47(3):287-301.
Zea mays	ZmMADS6	NM_001111683.1	ATGGGGAGGGGCCGGGTCGAGCTCAAGCGGATCGAGAACAAGATCAACCGCCAGGTCACCTTCGCCAAGCGCCGCAACGGCCTGCTCAAGAAGGCGTACGAGCTCTCGGTGCTCTGCGACGCCGAGGTCGCGCTCATCATCTTCTCCAACCGCGGCAAGCTCTACGAGTTCTCCAGCACGCAGAGCATGCCAAAAACACTTGAAAAGTACCAAAAATGCAGTTTTGCAGGGCCTGAAACAGCACTCCAGAATAGAGAGAATGAGCAACTGAAAAGTAGCCGCAATGAGTACCTCAAACTGAAGGCACGTGTTGATAATTTACAGCGGACTCAAAGGAACTTGCTTGGTGAAGATCTTGAGTCATTAGGCATAAAAGAGCTGGAGCACCTGGAGAAGCAG…	MGRGRVELKRIENKINRQVTFAKRRNGLLKKAYELSVLCDAEVALIIFSNRGKLYEFSSTQSMPKTLEKYQKCSFAGPETALQNRENEQLKSSRNEYLKLKARVDNLQRTQRNLLGEDLESLGIKELEHLEKQLDSSLKHIRSTRTQHMVDQLTELQKKEQMFCEANKCLRRRLEESNQVIWQHAWEQSERHSEVQPQQLNGNNFFHPLDGAGEPTLQIGYPSEALTSSCMTTFLPPWLP	Zhang, Z B, Li H Y, Zhang D F, et al. Characterization and expression analysis of six MADS-box genes in maize (Zea mays L.)[J]. J PLANT PHYSIOL, 2012, 2012,169(8)(-):797-806.
